# Supplementary material
Source: HighWire-hosted journal article supplement (http://www.cmaj.ca/highwire/filestream/58724/field_highwire_adjunct_files/1/case-kekre-2-at.pdf)

**Appendix 2:** The tumour was a moderately differentiated hepatocellular carcinoma (hematoxylin and eosin stain, 20x magnification).

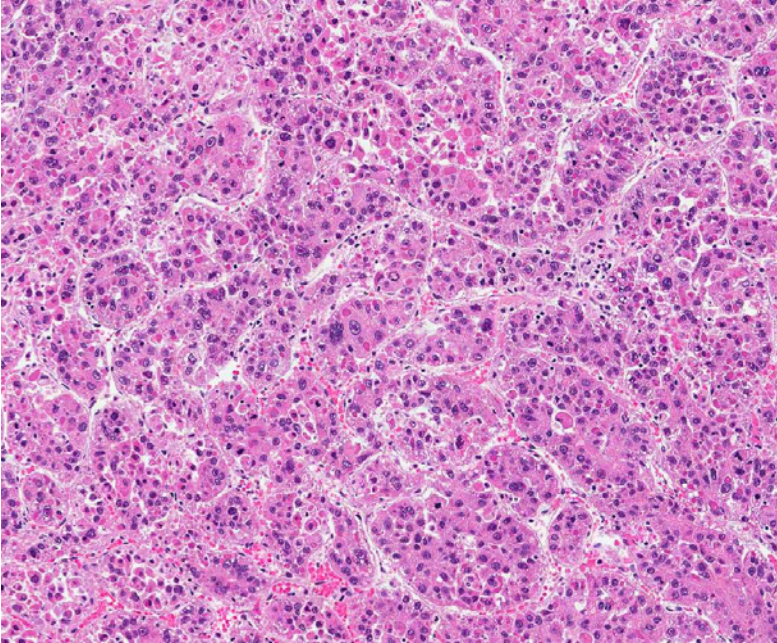

Supplement: case-kekre-2-at.pdf [file case-kekre-2-at.pdf]
